# Supplementary material
Source: PubMed Central journal article supplement (PMC1805108)
Supplement: mbc_E06-11-1021_1.pdf [file mbc_E06-11-1021_1.pdf]

1 GGACCTGCAAGGCCCCACC 20  
21 CACGCCGGGGCCGAGTAACCCCGCCGCTCTGGCACGCGGGCTCAGGCTGTCGCG 80  
81 GGAGCTCCTTGAAGCCCGTGGGAAACCTGGGCGCTTGGCGGAGACGCTTTGTGGCT 140  
141 GCTCTCTGGAGCATTTTTTCCCTTAGAGCTGTTGCTGTTTTCTGTGACGCCGCTTT 200  
201 TCTGAAAGACGGTGTGCGCTTTGGCTTATCTGGACGCTCCCAAAGTCCCGGAA 260  
261 AGGACACGGCCGGACACCTGGGGCTTGGTTCCGGCCGGAAGTCCGGGAGGTGTAGG 320  
321 GCTAGAGTTCTGCGCTGGCGGGCGGTTCTGCTGCTGCTGCGCGGCCGCTGGGCT 380  
381 ATGGGGCGCGGCTCGGGGCTGGCGGCTCCAGCAACAGCAGCGCCGGAGGACGCGGAG 440  
1 M G R R S R G R R L Q Q Q R P E D A E 20  
441 GATGGCCGCGAGGGTGTGAAAGCGCGGCGAGCGGGCTGGGAAGGAGGCTACCCGGAG 500  
21 D G A E G G G K R G E A G W E G G Y P E 40  
501 ATCGTCAAGGAGAACAAAGCTGTTCGAGCACTACTACAGGAGCTCAAGATCGTGCCGGAG 560  
41 I V K E N K L F E H Y Y Q E L K I V P E 60  
lep56  
561 GCGAGTGGGGCAGTTCATGGACGCTCTCAGGGAGCGCTCCGGCCACTTTAAGAATT 620  
61 G E W G Q F M D A L R E P L P A T L R I 80  
621 ACTGTTACAAAAGCCACGAAAAGAGATTCTCCATTGCTTAAAGAACAAATATTTTAAAG 680  
81 T G Y K S H A K E I L H C L K N K Y F K 100  
681 GAATTTGGAGACTGGAGGTGACGGTCAAGAAAGTTGAAAGTTCACAGCCACTGAGTTGG 740  
101 E L E D L E V D G Q K V E V P Q P L S W 120  
lep77-1  
741 ATCTCTGAAGAACTTGCCTGGCACACAAATTAAGTCAAAAATCTTGAGAAAATCGCCA 800  
121 Y P E E L A W H T N L S R K I L R K S P 140  
801 CACTTGGAAAAGTTTCACTAGTTCAGTTAGTGAACAGAATCTGGAATATAGTCGT 860  
141 H L E K F H Q F L V S E T E S G N I S R 160  
861 CAAGAAGCTGTAGCATGATCCACCACTGCTCCTCAAGCTGCGGCTCATCATAAGATC 920  
161 Q E A V S M I P P L L L N V R P H H K I 180  
921 TTAGATATGTGTCAGCACCTGGCTCAAAGACCACACAGTTAATGAAATGCTACATGCC 980  
181 L D M C A A P G S K T T Q L I E M L H A 200  
lep77-2  
981 GACATGAATGTCCCTTTCAGAGGGATTGTTATTGCGAATGATGTGGAACAAGCGC 1040  
201 D M N V P F P E G F V I A N D V D N K R 220  
1041 TGCTACTGCTGTCCATCAAGCAAGAGGCTGAGCAGCCCTGCATCATGGTGGTCAAC 1100  
221 C Y L L V H Q A K R L S S P C I M V V N 240  
1101 CATGATGCTCAGCATACCCAGGCTCCAGATAGATGTGGACGGCAGGAAAGATCCTC 1160  
241 H D A S S I P R L Q I D V D G R K E I L 260  
1161 TTCTATGATCAATTTTATGTGATGTCCTTGCAGTGGAGACGGCACTATGAGAAAAAC 1220  
261 F Y D R I L C D V P C S G D G T M R K N 280  
1221 ATTGATGTTGAAAAAGTGGACACCTTAAATAGCTTGCAGCTACATGCTTACAGCTG 1280  
281 I D V W K K W T T L N S L Q L H G L Q L 300  
1281 CGGATTGCAACACGCGGGGCTGAACAGCTGGCTGAAGGTGGAAGGATGGTATTCCAGG 1340  
301 R I A T R G A E Q L A E G G R M V Y S T 320  
1341 TGTTCACTAAACCTTATTGAGGATGAAGCAGTCATAGCATCTTACTGGAAAAAGTGAA 1400  
321 C S L N P I E D E A V I A S L L E K S E 340  
1401 GGTGCTTTGGAGCTGTGATGTGCTAATGAATGCCAGGCTGAAGTGGATGCCTGGA 1460  
341 G A L E L A D V S N E L P G L K W M P G 360  
1461 ATCACACAGTGAAGGTAATGACGAAGATGGCGAGTGTACAGACTGGGACGCTGTT 1520  
361 I T Q W K V M T K D G Q W F T D W D A V 380  
1521 CCTCACAGCAGACACCCAGATCCGACTACCATGTTCCCTCCGAAGGACCCAGAAAAAG 1580  
381 P H S R H T Q I R P T M F P P K D P E K 400  
1581 CTGACGGCCATGCACCTGGAGCGATGCCTTAGGATATTACCCATCATCAGAATCTGGA 1640  
401 L Q A M H L E R C L R I L P H H Q N T G 420  
1641 GGGTTTTTTTGGCAGTATTTGGTAAAAATCTTCAATGCCGTGGAATAAACGTGAGCCA 1700  
421 G F F V A V L V K K S S M P W N K R Q P 440  
1701 AAGCTTCAGGTAATCTGCAGAGACAGAGAAAGCACAGCTGAGCCCTGCAGATCTC 1760  
441 K L Q G K S A E T R E S T Q L S P A D L 460  
1761 ACAGAAGGGAAACCACAGATCCCTCTAAGCTGGAAGTCCGTCATTACAGAACTGGT 1820  
461 T E G K P T D P S K L E S P S F T G T G 480  
lep60  
1821 GACACAGAAATAGCTCATGCAACTGAGGATTTAGAGAATAATGGCAGTAAGAAGATGGC 1880  
481 D T E I A H A T E D L E N N G S K K D G 500  
1881 GTGTGTGCTCCTCCATCAAGAAAAATGAAGTTATTTGGATTTAAGAAGATCCATTT 1940  
501 V C G P P P S K K M K L F G F F K E D P F 520  
1941 GTATTTATCTGAAGATGACCCATTATTTCCACTATTGAGAATTTATGCTTTGGAT 2000  
521 V F I P E D D P L F P P I E K F Y A L D 540  
2001 CCTTATTCCCAAGGATGAATTTGTTAACTCGGACTACAGAAGGGAAGAAAGGAGCTC 2060  
541 P S F P R M N L L T R T T E G K K R Q L 560  
2061 TACATGGTTTCTAAGGAGTGGCGAATGTGCTGCTGAATAACAGTGAGAAGATGAAGTT 2120  
561 Y M V S K E L R N V L L N N S E K M K V 580  
2121 ATTAACACGGGGATCAAGTCTGGTGTAGAATAACACGGGTGAAGGTTGACTGTGCT 2180  
581 I N T G I K V W C R N N S G E E F D C A 600  
2181 TTCCGGCTGGCAGGGGGAATATATACATTGTATCCATTTATTAAGTCAAGAAATTT 2240  
601 F R L A R E G I Y T L Y P F I N S R I I 620  
2241 ACTGTATCAATGGAAGATGTTAAGTACTGTTGACCCAGGAAATCCCTTTTATGAAAA 2300  
621 T V S M E D V K I L L T Q E N P F F R K 640  
2301 CTCAGCAGTGAAGCTACAGTCAAGCAAGGACCTGGCAAGGGAAGCATCGCTGAAG 2360  
641 L S S E T Y S Q A K D L A K G S I V L K 660  
2361 TATGAACAGATTCTGGAATCCAGACGCTCTGCAAGTCCCATCGCTTATCGGATGG 2420  
661 Y E P D S A N P D A L Q C P I V L C G W 680  
2421 CGGGAAAGGCTCCTTCAAGTCTTTGTCGCAAGAAATGAAGGCTTATTATCTCAGG 2480  
681 R G K A S I R T F V P K N E R L H Y L R 700  
2481 ATGATGGGGCTGGAGTATTTGGGAGAAAAGAAGGAGGGGTTATCCTCACAATGAG 2540  
701 M M G L E V L G E K K K E G V I L T N E 720  
2541 AGTGACGCAGCCGGACAGCCAGCAATGACGTGACTGAGGGACAGAGCAGGAGAG 2600  
721 S A A S T G Q P D N D V T E G Q R A G E 740  
2601 CCCAACGCCAGATGCAGAAGGCGCAACAGTCCAGCAGTGCAGCAGGCTGTGACCCG 2660  
741 P N S P D A E E A N S P D V T A G C D P 760  
2661 GCGGGGCTCCTCCACCCCGGTGAGCAGGCCAAGGAGCGGGGGCCACACCCCTCACA 2720  
761 A G V H P P R \* 767  
2721 CGCAAACTGGCTCTTCTGCTCACTGGTGTGAAACAAATCCAGAGCAGCTGTGGC 2780  
2781 CTGTAAGCATATATTTCTAATGACTGCAGACTGGTGGATCATTAGGAGCTTCTGAATG 2840  
2841 ACCAGGACTGCTTCTTTGGAGCTGATGAAATGACTCTTTTACGCTGTTAGAATCAC 2900  
2901 TTGTTTTATTGTTCTTTGGCAGCTGGTCTAGTGTCTTTTGTGCGGAATAGAC 2960  
2961 TTTCAAAGTTGTACTTCTATCAAGAAACAAACTGCCCTTGCAAGAAATTCAGGCTTT 3020  
3021 TGTTAAGCCTGTATTGGCTTAAGGTGCAGTATTTTAAATTTATTTATAGAAAAGAA 3080  
3081 TCTATAAATCTTGGGAAAGTGTATAAGCTTTAAATTAATTCATTGAGCTGCACCTCA 3140  
3141 GTGGTGTGCTTAACATGCAAGTGGGGTTAATCTGAGGCTCAGATGACTTTGTGCTC 3200  
3201 TTTGGAATAAAGGTAATAAATAACTCCAGAGTAAGAGCTGTATCGTGAATGTCATA 3260  
3261 CTAATTTATTGAGGGGACTTATGTGCTTTTAAATGAAGTGCCTTACAATTTTATT 3320  
3321 TTAATGGGGTGGGACTCTTGAATATTTCAATAAAATGATAAAAATATAAAAAAAA 3380

**Supplementary Figure S1** Full-length cDNA sequences of NSUN2 and their predicted amino acid sequences. Peptide sequences indicated in red (lep56, lep77-1, lep77-2, and lep60) were determined by Edman analysis. The DNA sequences in blue indicate PCR primer sequences for 5'-RACE.
