# Supplementary material
Source: PubMed Central journal article supplement (PMC1805108)
Supplement: mbc_E06-11-1021_2.pdf [file mbc_E06-11-1021_2.pdf]

Supplementary Figure S2, by Sakita-Suto *et al*

Auora-A-shRNA #1 corresponding to nucleic acids 563-581 of NM\_198433.

Forward: 5'-gatccccatcatggaccgatctaaattcaagagatttagatcgggtccatgatgtttta-3'

Reverse: 5'-agcttaaaaacatcatggaccgatctaaatctcttgaatttagatcgggtccatgatggg-3'

Auora-A-shRNA #2 corresponding to nucleic acids 659-677 NM\_198433

Forward: 5'-gatccctcctgtcagaatccattattcaagagataatggattctgacaaggattttta-3'

Reverse: 5'-agcttaaaaatcctgtcagaatccattatctcttgaataatggattctgacaaggagg-3'

Aurora-A-shRNA #3 corresponding to nucleic acids 2501-2519 of NM\_198433

Forward: 5'-gatcccgcatgtgtgtaaactttaattcaagagattaaagtttacacacatgctttta-3'

Reverse: 5'-agcttaaaaagcatgtgtgtaaactttaatctcttgaattaaagtttacacacatgagg-3'

Aurora-B-shRNA #1 corresponding to nucleic acids 138-156 of NM\_004217

Forward: 5'-gatcccagcgagtcctccgaaagattcaagagatcttccggaggactcgtttttta-3'

Reverse: 5'-agcttaaaaaagcgagtcctccgaaagatcttgaatcttccggaggactcgtgg-3'

Aurora-B-shRNA #2 corresponding to nucleic acids 471-489 of NM\_004217

Forward: 5'-gatccctcctgcgtctctacaactattcaagagatagtttagagacgcaggattttta-3'

Reverse: 5'-agcttaaaaatcctgcgtctctacaactatcttgaatagtttagagacgcaggagg-3'

Aurora-B-shRNA #3 corresponding to nucleic acids 829-847 of NM\_004217

Forward: 5'-gatcccggtggtcattggagtgtttcaagagaaagcaactccaatgcaccactttta-3'

Reverse: 5'-agcttaaaaagtgtggtcattggagtgtttctcttgaagcaactccaatgcaccagg-3'

Auora-C-shRNA #1 corresponding to nucleic acids 611-629 of NM\_001015878

Forward: 5'-gatcccagcgcacagccacgataattcaagagaattatcgtggctgtgcgctttta-3'

Reverse: 5'-agcttaaaaagcgcacagccacgataattctcttgaattatcgtggctgtgcgctgg-3'

Auora-C-shRNA #2 corresponding to nucleic acids 653-671 of NM\_001015878

Forward: 5'-gatccccactactgcatgacaagaattcaagagattctgtcatggcagtaggtttta-3'

Reverse: 5'-agcttaaaaactactgcatgacaagaatctcttgaattctgtcatggcagtagggg-3'

Aurora-C-shRNA #3 corresponding to nucleic acids 799-817 of NM\_001015878

Forward: 5'-gatcccactactgcccagaaattcaagagattctggcggcaagtagtctttta-3'

Reverse: 5'-agcttaaaaagactactgcccagaaatctcttgaattctggcggcaagtagtgg-3';)

SAKI-shRNA #1 corresponding to nucleic acids 465-483 of

Forward: 5'-gatccctggaaatattagtcgtcaattcaagagattgacgactaatattccattttta-3'

Reverse: 5'-agcttaaaaatgaaatattagtcgtcaatctcttgaattgacgactaatattccagg-3'

SAKI-shRNA #2 corresponding to nucleic acids 638-656 of

Forward: 5'- gatccccgaatgatgtggacaacaattcaagagattgttccacatcattcgtttta-3'

Reverse: 5'-agcttaaaaacgaatgatgtggacaacaatctcttgaattgttccacatcattcggg-3'

SAKI-shRNA #3 corresponding to nucleic acids 1455-1473 of

Forward: 5'-gatccc.tcatgcaactgaggatttattcaagagataaatcctcagttgcatgattttta-3'

Reverse: 5'-agcttaaaaatcatgcaactgaggatttattcttgaataaatcctcagttgcatgagg-3')

Supplementary Figure S2 PCR primers for shRNAs used in this study.
