# Supplementary material
Source: PubMed Central journal article supplement (PMC1805108)
Supplement: mbc_E06-11-1021_3.pdf [file mbc_E06-11-1021_3.pdf]

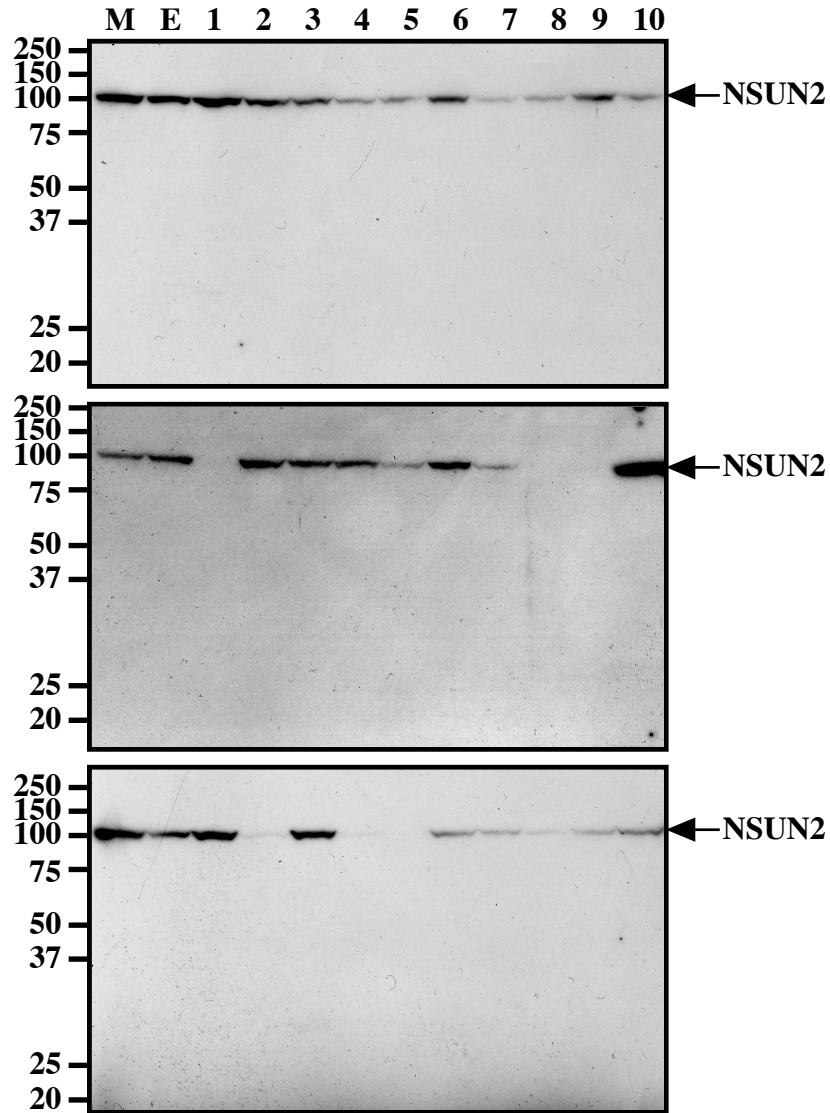

**Supplementary Figure S3** Repression of NSUN2 expression by shRNA in HeLa cells. HeLa cells were transfected with NSUN2-shRNA #1, #2, or #3. Puromycin-resistance clones were obtained, and each clone (clone number 1-10) was expanded and analyzed for the repression of NSUN2 protein expression. M, mock-transfected; E, empty vector-transfected.
