# Supplementary material
Source: PubMed Central journal article supplement (PMC1805108)
Supplement: mbc_E06-11-1021_4.pdf [file mbc_E06-11-1021_4.pdf]

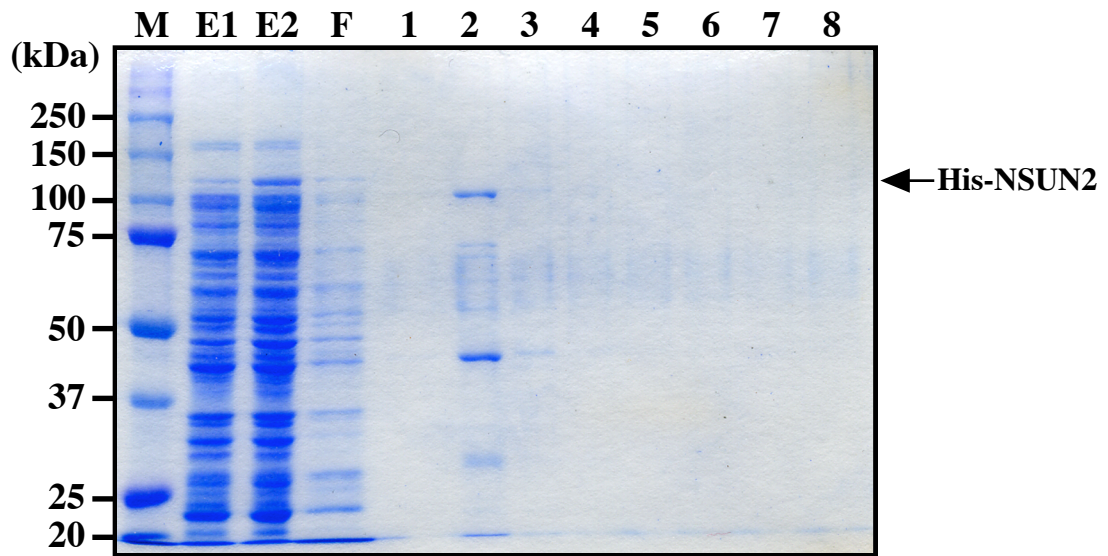

**Supplementary Figure S4** Single-step purification of recombinant His-NSUN2-WT and His-NSUN2-SA proteins. Representative results are shown for His-NSUN2-WT. His-NSUN2-SA shows similar purification profile. Protein samples were separated by 10% SDS-PAGE and were visualized by staining with Coomassie brilliant blue. M, molecular weight markers); E1, cell extract before induction with IPTG (isopropyl-beta-D-thiogalactopyranoside); E2, cell extract after induction with IPTG; F, flow-through. Numbers indicate column fraction numbers. *Arrow* indicates the approximate location of purified human NSUN2 protein.
