# Supplementary material
Source: PubMed Central journal article supplement (PMC1805108)
Supplement: mbc_E06-11-1021_5.pdf [file mbc_E06-11-1021_5.pdf]

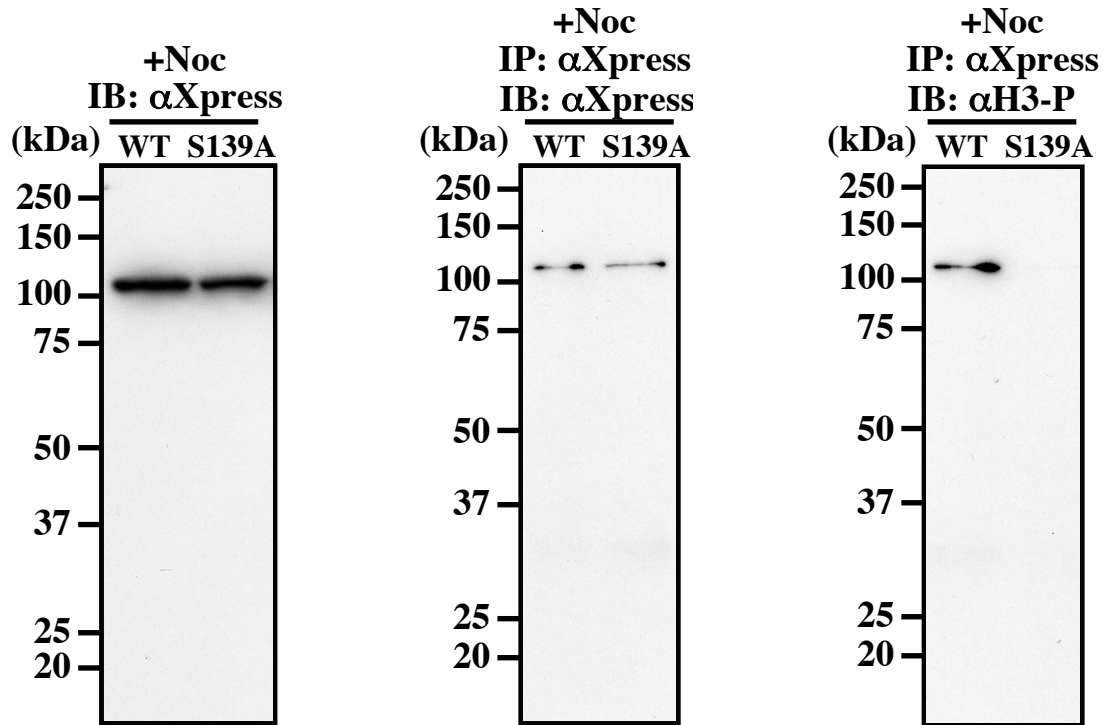

**Supplementary Figure S5** Immunoprecipitation of Xpress-NSUN2. HeLa cells were transfected with pcDNA3.1(-)-NSUN2-SA or pcDNA3.1-Xpress-NSUN2-SA. Transfected cells were treated with nocodazole for 18 h, lysed, and immunoprecipitated with an anti-Xpress antibody. Xpress-NSUN2-WT was detected in the anti-Xpress-immunoprecipitated sample by  $\alpha$ H3-P. In addition, Xpress-NSUN2-WT but not Xpress-NSUN2-SA was detected in the  $\alpha$ H3-P-immunoprecipitated sample by immunoblotting with the anti-Xpress antibody (data not shown).
