# Supplementary material
Source: PubMed Central journal article supplement (PMC1805108)
Supplement: mbc_E06-11-1021_6.pdf [file mbc_E06-11-1021_6.pdf]

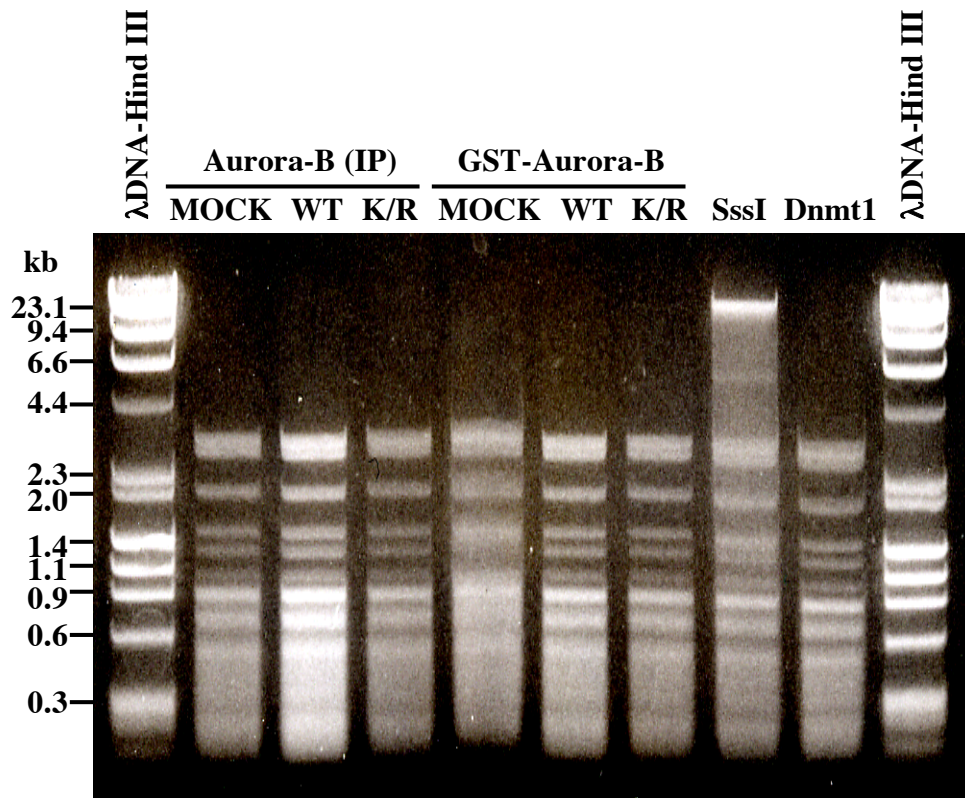

**Supplementary Figure S6** Methyltransferase assay for DNA that is not methylated on either strand. Purified NSUN2 following phosphorylation reaction with immunoprecipitated Aurora-B or GST-Aurora-B were used, and the reaction mixtures were digested with *Bst*U I.  $\lambda$ DNA-Hind III, size marker.
